# Supplementary material
Source: MDPI journal article supplement (https://www.mdpi.com/2073-4441/9/5/325)
Supplement: s1 [file s1]

Supplementary Information:

Table S1. Survey questions during the door-to-door interviews and example responses for Kotormo, a water-regulated community near Toktogul reservoir that was relocated in 1969 due to construction of Toktogul Dam.

| Survey prompt                 | Response                                                                                                                                                         |
|-------------------------------|------------------------------------------------------------------------------------------------------------------------------------------------------------------|
| Households/ population        | 300/~1,600                                                                                                                                                       |
| Land allotment hectare/family | 0.28                                                                                                                                                             |
| Main crops in 2000            | vegetables, wheat, barley, millet                                                                                                                                |
| Main crops in 2016            | maize, potatoes, onion, carrots                                                                                                                                  |
| Water price and availability  | 1.5 Kyrgyz som for seasonal water ration; water not guaranteed                                                                                                   |
| Household income 2000         | Jobs in Russia, Kazakhstan and Bishkek                                                                                                                           |
|                               | Garden and small plots are not enough to feed the family                                                                                                         |
| Household income 2016         | Jobs in Russia, Kazakhstan and Bishkek                                                                                                                           |
|                               | Garden and small plots                                                                                                                                           |
|                               | Animal stock                                                                                                                                                     |
| Migration, reasons            | Unemployment, not enough land for a family                                                                                                                       |
|                               | ~50% (376 out of 776 of adult population) is in Russia, Kazakhstan, Bishkek                                                                                      |
| Main needs                    | Irrigation water; best served with gravitation canals, not electrical water pumps                                                                                |
|                               | More land if possible, land plots are smaller than in neighboring Terek Suu                                                                                      |
|                               | Clean water                                                                                                                                                      |
|                               | Jobs/employment                                                                                                                                                  |
|                               | Reservoir (from underground spring)                                                                                                                              |
|                               | First aid station/small clinic                                                                                                                                   |
| Changes (2000-2016)           | No positive changes                                                                                                                                              |
|                               | Increase in poverty                                                                                                                                              |
|                               | Increase in drinking water demand                                                                                                                                |
|                               | Not enough clean drinking water supply due to resettlement and deteriorated drinking water system. Need to install new pipes and access for increased population |
|                               | Decrease in crop productivity and yield due to limited irrigation water.                                                                                         |

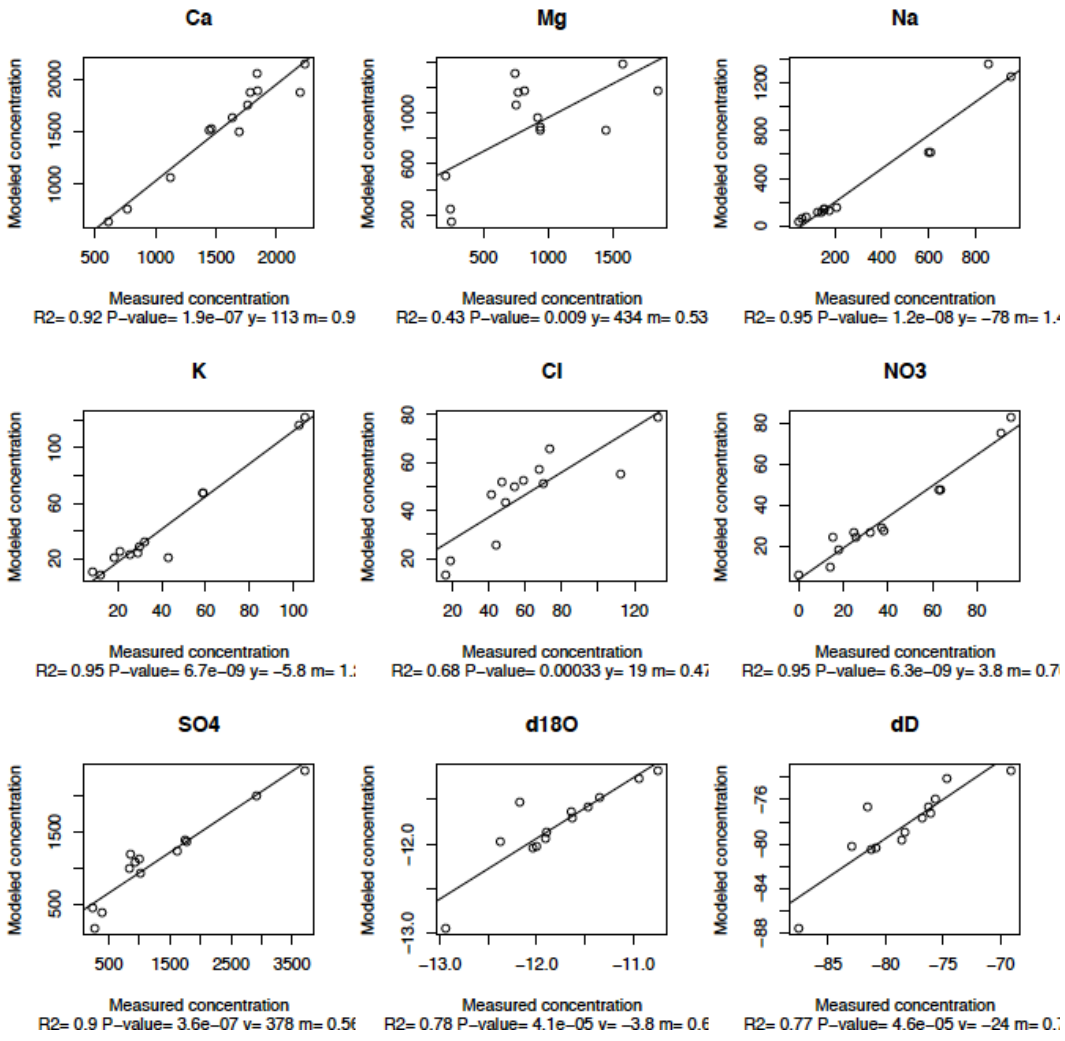

(a)

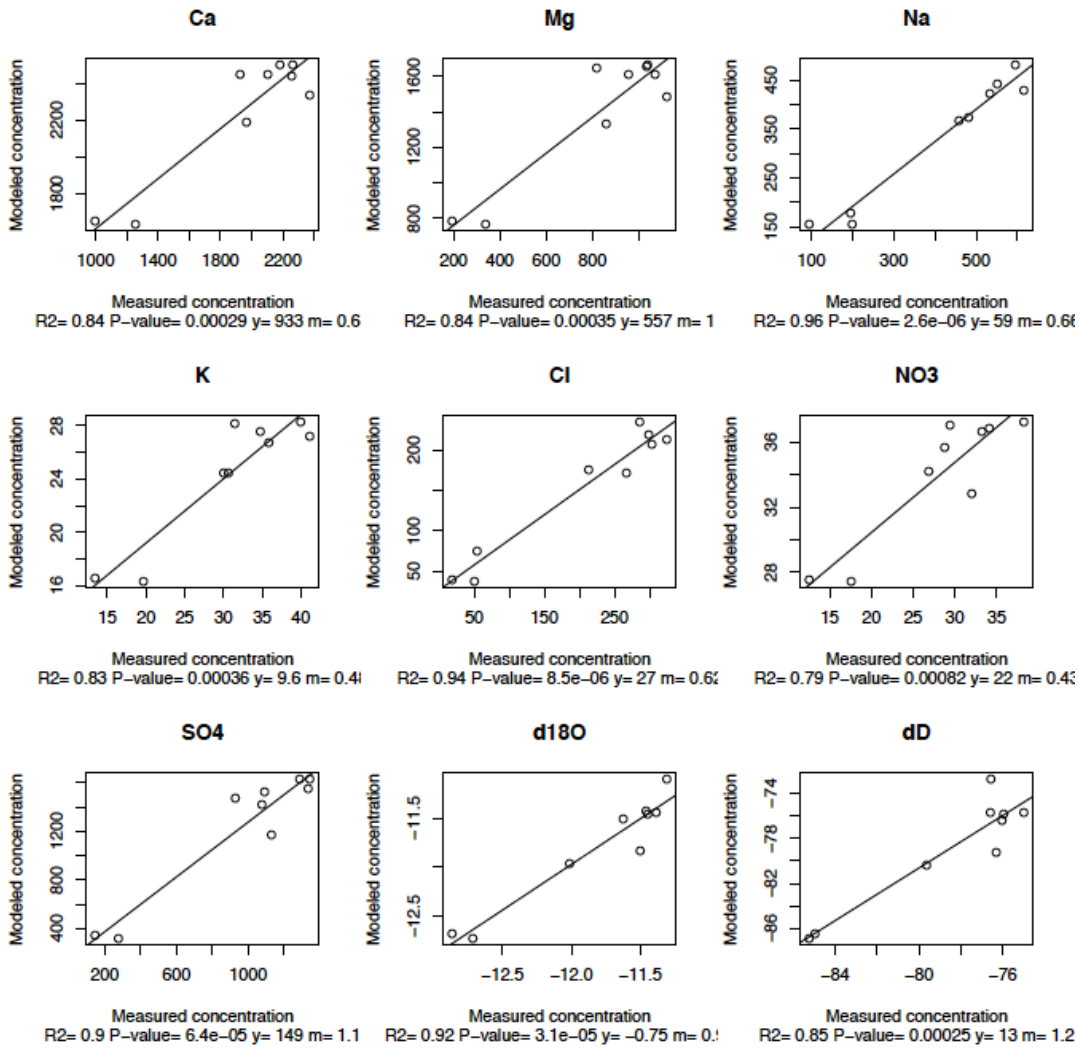

(b)

Figure S1: Observed hydro-chemical concentrations versus hydrochemistry model reconstruction for mixing model validation for Upper Naryn (a) and Lower Naryn (b) models.
